# Supplementary material for: The Swi2–Snf2-like protein Uls1 is involved in replication stress response
Source: PubMed Central journal article supplement — Nucleic Acids Res. 2011 Jul 15;39(20):8765–77. doi: 10.1093/nar/gkr587 (PMC3203583; doi:10.1093/nar/gkr587), 2011-07-15
Supplement: supp_gkr587_Supplementary_data.pdf [file supp_gkr587_Supplementary_data.pdf]

## Supplementary Table S1

Yeast strains used in this work.

| Strain   | Genotype                                                             | Source       |
|----------|----------------------------------------------------------------------|--------------|
| W303-1A  | <i>MATa ade2-1 can1-100 ura3-1 his3-11,15 leu2-3,112 trp1-1 RAD5</i> | R. Rothstein |
| MC001    | <i>MATa uls1Δ::TRP1</i>                                              | This study   |
| MC002    | <i>MATa rad51Δ::kanMX6</i>                                           | This study   |
| MC003    | <i>MATa uls1Δ::TRP1 rad51Δ::kanMX6</i>                               | This study   |
| MC004    | <i>MATa rad57Δ::kanMX6</i>                                           | This study   |
| MC005    | <i>MATa uls1Δ::TRP1 rad57Δ::kanMX6</i>                               | This study   |
| MC006    | <i>MATa rad52Δ::kanMX6</i>                                           | This study   |
| MC007    | <i>MATa uls1Δ::TRP1 rad52Δ::kanMX6</i>                               | This study   |
| MC008    | <i>MATa mus81Δ::kanMX6</i>                                           | This study   |
| MC009    | <i>MATa uls1Δ::TRP1 mus81Δ::kanMX6</i>                               | This study   |
| MC010    | <i>MATa srs2Δ::kanMX6</i>                                            | This study   |
| MC011    | <i>MATa uls1Δ::TRP1 srs2Δ::kanMX6</i>                                | This study   |
| MC012    | <i>MATa sgs1Δ::kanMX6</i>                                            | This study   |
| MC013    | <i>MATa uls1Δ::TRP1 sgs1Δ::kanMX6</i>                                | This study   |
| MC012    | <i>MATa rmi1Δ::kanMX6</i>                                            | This study   |
| MC013    | <i>MATa uls1Δ::TRP1 rmi1Δ::kanMX6</i>                                | This study   |
| MC012    | <i>MATa yen1Δ::kanMX6</i>                                            | This study   |
| MC013    | <i>MATa uls1Δ::TRP1 yen1Δ::kanMX6</i>                                | This study   |
| W1868-8B | <i>MATa SUP4-o::URA3</i>                                             | R. Rothstein |
| MC014    | <i>MATa uls1Δ::TRP1 SUP4-o::URA3</i>                                 | This study   |
| JJ001    | <i>MATa sgs1::kanMX6 SUP4-o::URA3</i>                                | This study   |
| JJ002    | <i>MATa uls1Δ::TRP1 sgs1::kanMX6 SUP4-o::URA3</i>                    | This study   |
| W4314-2C | <i>MATα rDNA::ADE2-CAN1</i>                                          | R. Rothstein |
| W6666-6D | <i>MATa sgs1::HIS3 rDNA::ADE2-CAN1</i>                               | R. Rothstein |
| JJ003    | <i>MATα uls1Δ::TRP1 rDNA::ADE2-CAN1</i>                              | This study   |
| JJ004    | <i>MATa uls1Δ::TRP1 sgs1::HIS3 rDNA::ADE2-CAN1</i>                   | This study   |

|       |                                        |            |
|-------|----------------------------------------|------------|
| MC015 | <i>MATa top3Δ::kanMX6</i>              | This study |
| MC016 | <i>MATa uls1Δ::TRP1 top3Δ::kanMX6</i>  | This study |
| MC017 | <i>MATa rad5Δ::kanMX6</i>              | This study |
| MC018 | <i>MATa uls1Δ::TRP1 rad5Δ::kanMX6</i>  | This study |
| MC019 | <i>MATa rad18Δ::kanMX6</i>             | This study |
| MC020 | <i>MATa uls1Δ::TRP1 rad18Δ::kanMX6</i> | This study |
| MC021 | <i>MATa rev3Δ::kanMX6</i>              | This study |
| MC022 | <i>MATa uls1Δ::TRP1 rev3Δ::kanMX6</i>  | This study |
| MC023 | <i>MATa rad59Δ::kanMX6</i>             | This study |
| MC024 | <i>MATa uls1Δ::TRP1 rad59Δ::kanMX6</i> | This study |
| MC025 | <i>MATa mph1Δ::kanMX6</i>              | This study |
| MC026 | <i>MATa uls1Δ::TRP1 mph1Δ::kanMX6</i>  | This study |

---

## Supplementary Figure S1

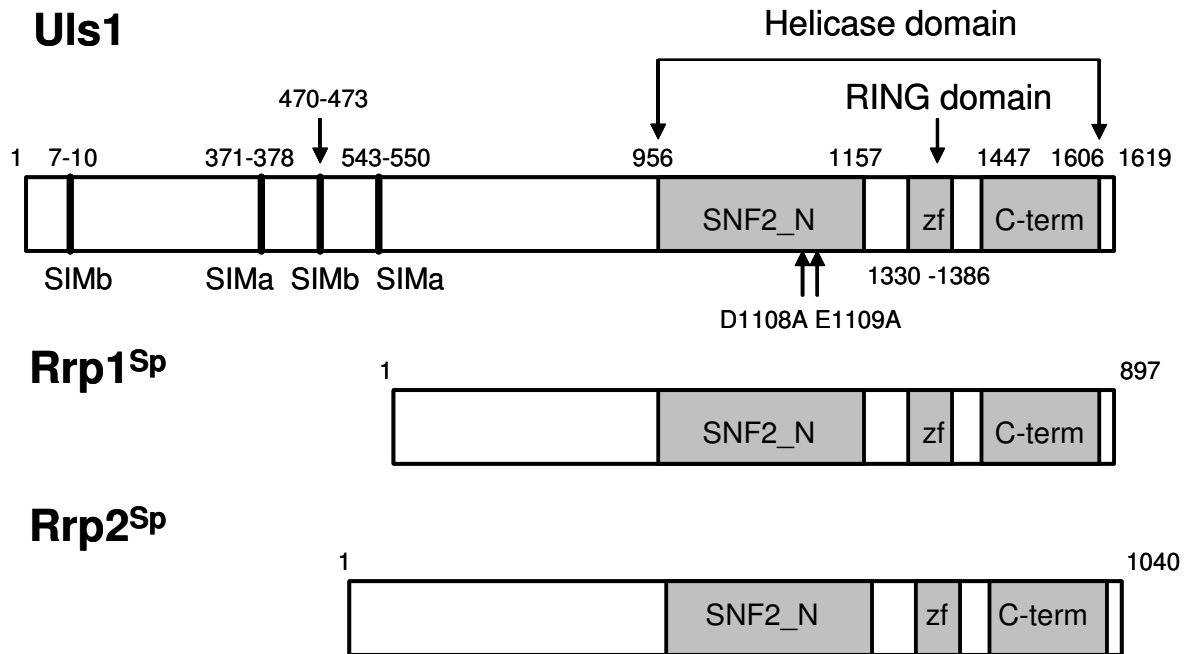

**Figure S1.** Schematic representation of Uls1, Rrp1<sup>Sp</sup> and Rrp2<sup>Sp</sup> domain structures and the sites of point mutations introduced in this study. SIMa, SUMO interacting motif, type a; SIMb, SUMO interacting motif, type b; SNF2\_N, SNF2 family N-terminal/helicase ATP-binding domain; zf, RING type zinc finger domain; C-term, C-terminal helicase domain.

## Supplementary Figure S2

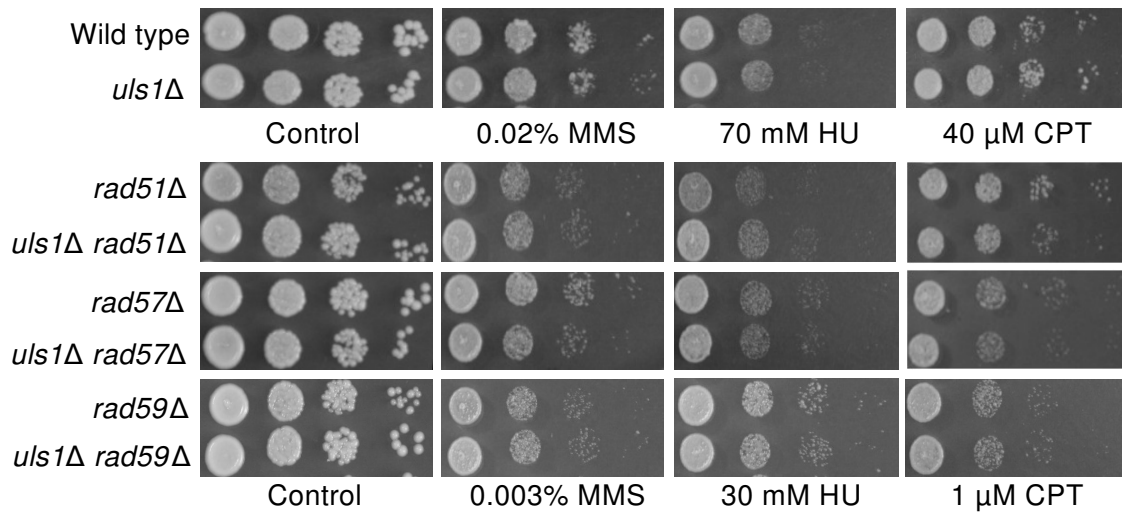

**Figure S2.** Epistasis analysis between *ULS1* and homologous recombination genes. Ten-fold serial dilutions of each strain were spotted onto YPD plates in the presence or absence of DNA damaging agents. Plates were photographed after 2 days at 28°C.

### Supplementary Figure S3

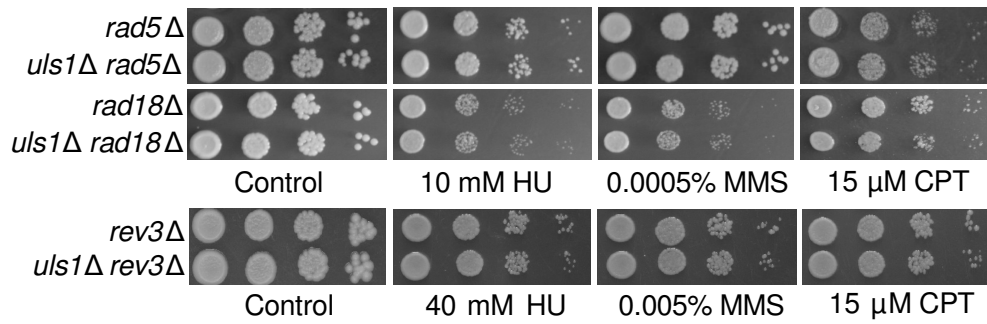

**Figure S3.** Epistasis analysis between *ULS1* and post-replication repair genes. Ten-fold serial dilutions of each strain were spotted onto YPD plates in the presence or absence of DNA damaging agents. Plates were photographed after 2 days at 28°C.

## Supplementary Figure S4

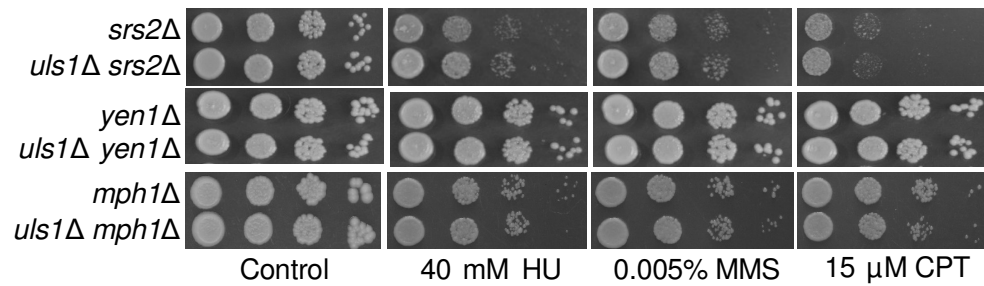

**Figure S4.** Epistasis analysis between *ULS1* and DNA repair genes. Ten-fold serial dilutions of each strain were spotted onto YPD plates in the presence or absence of DNA damaging agents. Plates were photographed after 2 days at 28°C.
